# Supplementary material for: Synthesis of hierarchically porous ZSM-5 zeolites by steam-assisted crystallization of dry gels silanized with short-chain organosilanes
Source: Royal Society of Chemistry journal article supplement (doi:10.1039/c4nj00811a), 2014-01-01
Supplement: c4nj00811a1.pdf [file c4nj00811a1.pdf]

## Supporting Information

# Synthesis of Hierarchically Porous ZSM-5 Zeolites by Steam-assisted Crystallization of Dry Gel Silanized with Short-chain Organosilane

Yicheng Zhang<sup>a</sup>, Kake Zhu<sup>a</sup>, Xinggui Zhou<sup>\*a</sup> and Weikang Yuan<sup>a</sup>

<sup>a</sup> State Key Laboratory of Chemical Engineering, East China University of Science and Technology, Shanghai, 200237, P. R. China.

E-mail: [xgzhou@ecust.edu.cn](mailto:xgzhou@ecust.edu.cn)

Fax: +86 21 64253528; Tel: +86 21 64253509

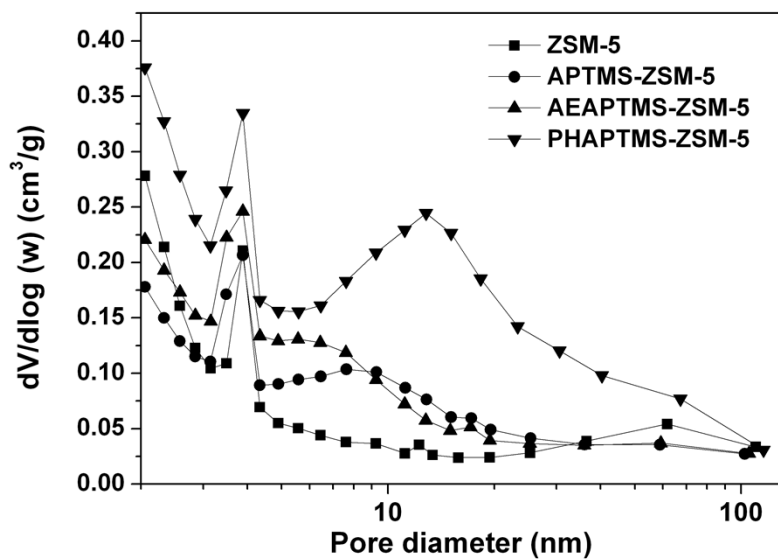

Fig. S1 BJH pore size distributions of ZSM-5, APTMS-ZSM-5, AEAPTMS-ZSM-5 and PHAPTMS-ZSM-5 derived from the desorption branch.

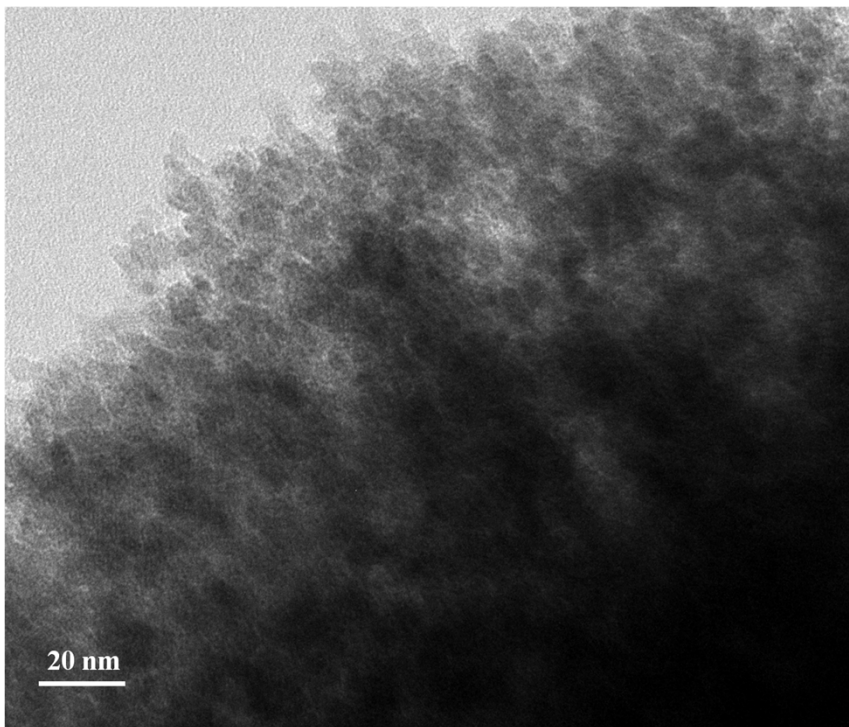

Fig. S2 Enlarged view of TEM image of PHAPTMS-ZSM-5

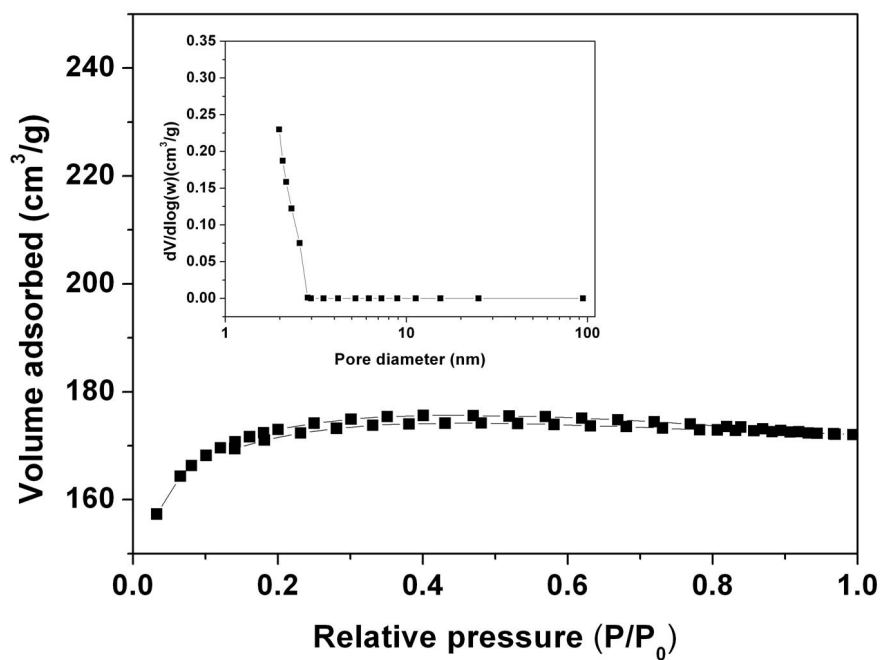

Fig. S3 Nitrogen adsorption-desorption isotherm of calcined CON-0h and inset BJH pore size distribution derived from the adsorption branch.

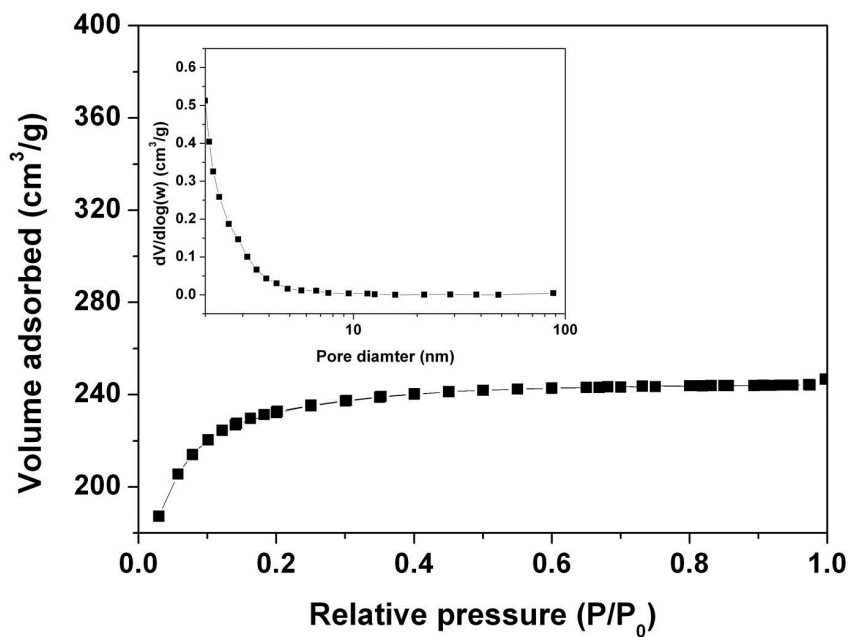

Fig. S4 Nitrogen adsorption-desorption isotherm of calcined HDTMS-0h and inset BJH pore size distribution derived from the adsorption branch.

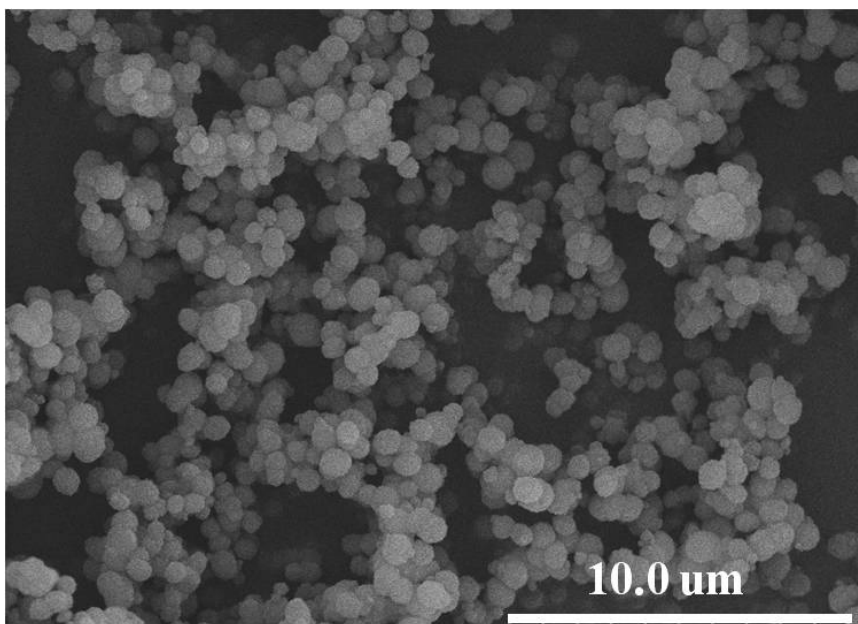

Fig. S5 Low magnification SEM image of PHAPTMS-ZSM-5 (72-HPZ).

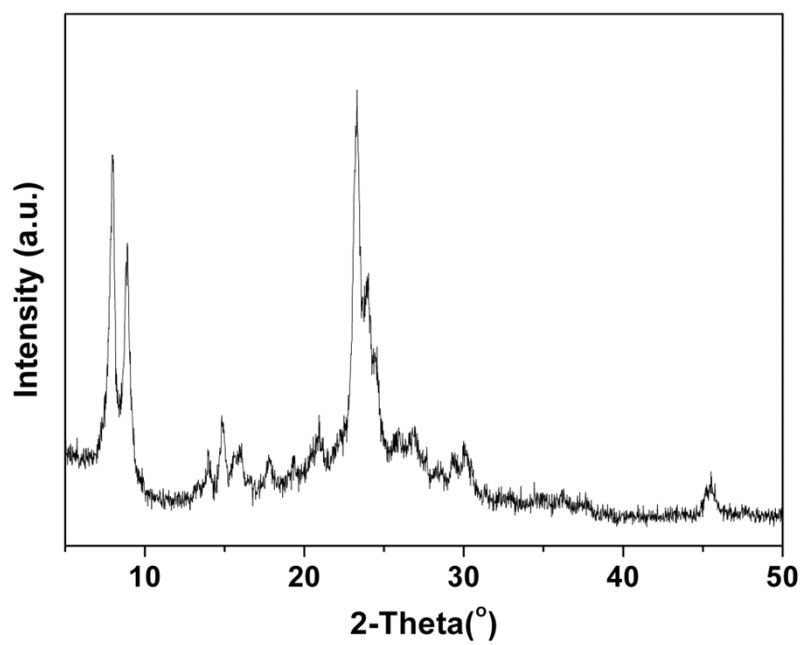

Fig. S6 XRD pattern of calcined CON-3h.

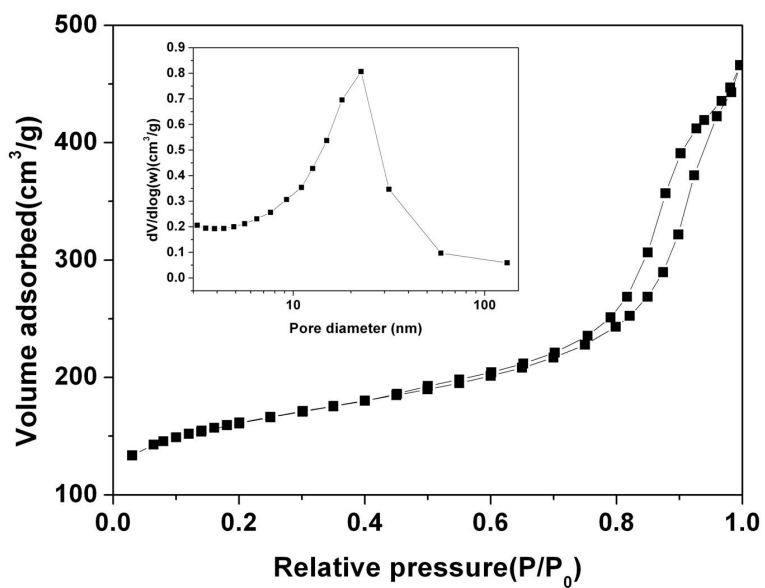

Fig. S7 Nitrogen adsorption-desorption isotherm of calcined CON-3h and inset BJH pore size distribution derived from the adsorption branch.

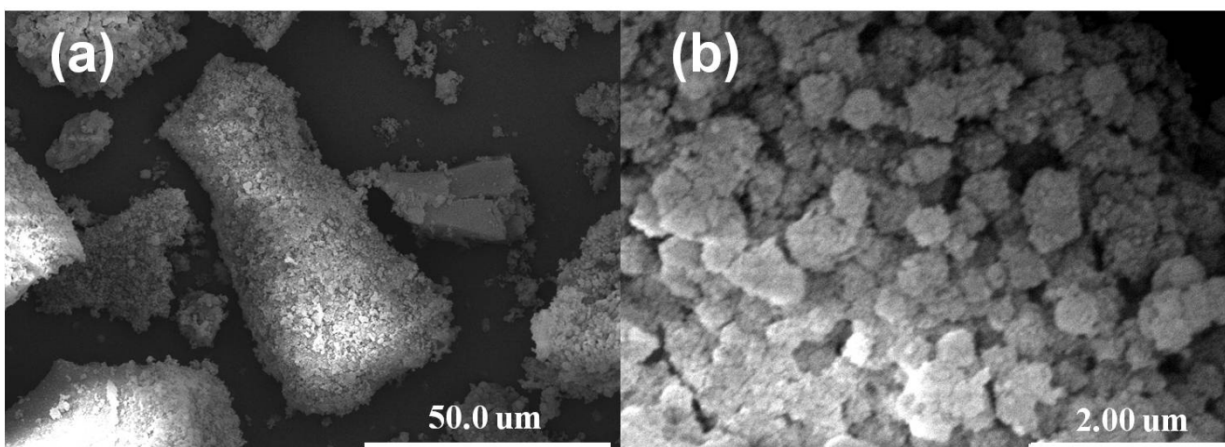

Fig. S8 SEM images of (a and b) calcined CON-3h.
